# Supplementary material for: Adolescent Exploratory Strategies and Behavioral Types in the Multivariate Concentric Square FieldTM Test
Source: Front Behav Neurosci. 2019 Mar 4;13:41. doi: 10.3389/fnbeh.2019.00041 (PMC6409336; doi:10.3389/fnbeh.2019.00041)
Supplement: Supplementary file 4 [file Data_Sheet_1.CSV]

Animal ID	Behavioral type	MCSF test order	Complementary test	Body weight 1	Body weight 2	L leave	L CTRCI	L corridor a	L corridor B	L corridor c	L DCR	L hurdle	L slope	L bridge entrance	L bridge	F center	F CTRCI	F corridor a	F corridor b	F corridor c	F total corridor	F DCR	F hurdle	F slope	F bridge entrance	F bridge	D center	D CTRCI	D corridor a	D corridor b	D corridor c	D total corridor	D DCR	D hurdle	D slope	D bridge entrance	D bridge	D/F center	D/F CTRCI	D/F total corridor	D/F DCR	D/F hurdle	D/F slope	D/F bridge entrance	D/F bridge	Total activity MCSF	Rearing MCSF	Nose pokes	Grooming MCSF
S1	Main type	Second	SPB	116,20	172,47	77,32	345,68	77,32	195,44	218,60	85,40	209,00	229,04	237,64	244,56	15	5	12	5	11	28	8	5	12	12	6	223,56	2,36	149,24	72,08	90,60	311,92	172,92	140,00	80,32	40,36	228,40	14,90	0,47	11,14	21,62	28,00	6,69	3,36	38,07	91	93	1	1
S2	Main type	First	SPB	120,43	153,63	78,32	582,64	171,64	78,32	365,96	187,80	101,76	380,80	465,40	467,32	15	2	9	10	12	31	5	8	12	12	6	222,80	1,08	83,68	174,16	122,76	380,60	78,32	158,12	116,52	41,00	201,40	14,85	0,54	12,28	15,66	19,77	9,71	3,42	33,57	91	107	1	1
S3	Explorer	First	SPB	121,13	149,40	39,96	192,20	435,24	280,12	39,96	452,36	268,88	63,12	97,20	101,84	13	3	8	5	19	32	5	6	21	19	9	167,32	2,28	97,00	66,88	157,28	321,16	116,28	125,40	131,00	56,00	280,52	12,87	0,76	10,04	23,26	20,90	6,24	2,95	31,17	108	74	1	0
S4	Main type	Second	SPB	95,33	150,67	47,56	161,24	47,56	174,56	213,04	88,04	197,92	222,64	258,00	260,88	16	7	11	3	14	28	5	6	13	12	6	192,88	5,32	185,32	55,52	111,40	352,24	208,60	132,28	82,12	37,04	189,32	12,06	0,76	12,58	41,72	22,05	6,32	3,09	31,55	93	86	0	0
S5	Shelter seeker	First	SPB	104,29	131,44	117,68		117,68	963,80	1058,32	133,04	1000,00	1075,64	1093,32	1099,76	7	0	15	2	2	19	10	1	3	3	2	198,52	0,00	219,28	49,20	25,36	293,84	572,92	18,40	31,56	10,56	74,08	28,36		15,47	57,29	18,40	10,52	3,52	37,04	45	20	0	0
S6	Main type	Second	SPB	109,46	160,18	29,12	588,92	177,08	274,40	29,12	360,88	284,44	49,96	61,16	62,20	16	4	10	3	19	32	6	4	17	13	7	131,56	1,56	131,24	38,36	226,80	396,40	150,48	85,56	169,96	50,56	213,80	8,22	0,39	12,39	25,08	21,39	10,00	3,89	30,54	99	78	0	1
S7	Explorer	First	SPB	122,36	156,71	91,32	674,20	91,32	426,40	446,96	102,72	440,72	453,48	489,88	492,20	20	7	14	5	16	35	7	7	15	13	7	278,96	5,00	148,52	73,88	126,28	348,68	160,76	99,16	90,44	37,76	179,12	13,95	0,71	9,96	22,97	14,17	6,03	2,90	25,59	111	156	1	0
S8	Explorer	First	SPB	129,16	157,63	27,32	145,32	27,32	201,60	65,64	38,92	351,00	72,72	75,60	77,96	14	2	9	3	21	33	4	6	22	20	9	165,24	7,32	110,72	41,00	195,20	346,92	50,36	154,44	170,84	48,40	256,28	11,80	3,66	10,51	12,59	25,74	7,77	2,42	28,48	110	64	0	0
S9	Main type	First	SPB	104,76	141,43	46,64	654,72	46,64	203,48	250,56	85,32	215,44	262,20	278,16	281,04	13	2	11	5	12	28	6	4	13	12	7	169,92	0,84	151,36	64,00	98,32	313,68	211,12	74,00	123,88	46,20	260,28	13,07	0,42	11,20	35,19	18,50	9,53	3,85	37,18	85	79	1	1
S10	Explorer	First	SPB	113,36	144,41	17,04	569,04	209,48	17,04	296,64	221,28	25,16	304,40	313,40	314,96	16	4	13	7	14	34	7	7	16	15	8	94,28	2,36	102,12	86,44	97,16	285,72	128,20	243,12	137,28	33,16	275,76	5,89	0,59	8,40	18,31	34,73	8,58	2,21	34,47	107	99	1	1
S11	Shelter seeker	Second	SPB	111,22	163,49	28,28		28,28	981,96	567,36	45,84	646,96	583,12	586,56	589,96	6	0	12	2	7	21	9	3	7	7	4	115,00	0,00	240,24	35,20	86,64	362,08	273,44	114,48	74,84	34,56	225,44	19,17		17,24	30,38	38,16	10,69	4,94	56,36	57	69	0	0
S12	Main type	Second	SPB	136,56	184,84	16,44	275,28	584,80	47,72	16,44	614,36	37,60	140,80	152,84	156,48	15	5	8	6	14	28	5	7	14	14	7	173,92	6,28	175,24	107,52	176,72	459,48	83,08	126,64	76,80	36,36	237,28	11,59	1,26	16,41	16,62	18,09	5,49	2,60	33,90	95	57	2	3
S13	Main type	Second	SPB	93,38	154,69	78,40		331,92	237,00	78,40	339,20	164,60	97,64	115,88	122,72	9	0	9	5	14	28	6	5	15	13	6	260,64	0,00	127,64	52,28	104,60	284,52	216,72	70,76	118,76	42,52	206,12	28,96		10,16	36,12	14,15	7,92	3,27	34,35	82	72	0	2
S14	Main type	First	SPB	155,28	169,71	59,76	22,92	319,84	165,96	59,76	326,92	173,48	99,12	214,16	218,32	18	6	11	4	14	29	6	5	10	8	4	215,88	4,52	119,12	78,72	143,20	341,04	217,84	127,88	112,44	40,64	139,56	11,99	0,75	11,76	36,31	25,58	11,24	5,08	34,89	86	72	2	0
S15	Main type	First	SPB	116,12	149,66	115,80	12,52	492,12	428,16	115,80	525,44	293,80	156,08	171,76	175,08	10	2	7	4	12	23	4	5	13	12	6	225,72	1,76	120,04	76,52	165,84	362,40	65,68	183,44	115,04	31,92	213,56	22,57	0,88	15,76	16,42	36,69	8,85	2,66	35,59	75	75	2	2
S16	Intermediate	First	SPB	133,87	190,89	21,60		21,60	944,96	426,20	45,84	560,08	453,72	465,32	471,24	10	0	17	2	13	32	12	4	12	9	4	118,60	0,00	193,88	29,80	156,20	379,88	309,64	70,00	93,52	17,80	210,40	11,86		11,87	25,80	17,50	7,79	1,98	52,60	83	64	1	0
S17	Explorer	Second	SPB	124,19	190,82	37,20	203,60	208,32	318,20	37,20	213,40	125,88	50,84	54,92	56,80	19	5	11	6	21	38	6	8	19	17	9	164,80	3,08	131,80	55,72	172,80	360,32	151,60	123,68	86,60	32,28	277,36	8,67	0,62	9,48	25,27	15,46	4,56	1,90	30,82	121	69	2	0
S18	Explorer	Second	SPB	126,89	178,89	25,80	160,64	25,80	225,32	92,96	39,68	218,12	111,88	117,56	120,40	32	14	17	5	18	40	7	10	13	13	6	233,08	9,24	190,96	85,60	110,12	386,68	66,08	203,72	50,04	37,00	214,04	7,28	0,66	9,67	9,44	20,37	3,85	2,85	35,67	135	113	1	1
S19	Intermediate	Second	SPB	101,53	156,69	37,92	594,32	182,52	37,92	59,60	190,80	47,76	82,68	86,16	89,36	9	1	6	5	13	24	3	6	15	14	7	139,56	0,44	78,48	41,88	190,68	311,04	65,48	90,36	203,32	95,04	294,68	15,51	0,44	12,96	21,83	15,06	13,55	6,79	42,10	79	38	1	1
S20	Main type	Second	SPB	132,65	185,64	19,32		19,32	199,08	183,80	27,96	401,44	456,68	616,20	621,56	14	0	16	8	14	38	9	7	13	11	6	165,92	0,00	187,32	106,96	141,92	436,20	144,64	143,56	78,52	32,00	198,96	11,85		11,48	16,07	20,51	6,04	2,91	33,16	98	59	0	0
S21	Main type	Second	SPB	119,69	170,68	148,40	407,80	221,12	148,40	373,96	240,56	176,96	396,60	466,44	469,36	14	3	12	7	12	31	7	7	12	11	6	265,52	5,36	144,12	88,28	121,32	353,72	98,72	116,20	75,88	41,64	242,88	18,97	1,79	11,41	14,10	16,60	6,32	3,79	40,48	91	101	2	0
S22	Main type	First	SPB	123,10	151,89	87,56	238,48	482,32	333,08	87,56	487,96	350,64	113,28	126,60	130,56	11	1	10	3	17	30	7	5	15	12	6	247,84	0,80	122,40	37,64	157,96	318,00	150,20	96,04	96,36	42,16	248,20	22,53	0,80	10,60	21,46	19,21	6,42	3,51	41,37	87	54	0	0
M1	Main type	First	MCSF	144,12	192,11	11,40	85,84	11,40	140,44	90,92	42,80	134,44	115,20	176,16	177,32	15	3	10	7	14	31	5	8	11	8	4	210,92	3,00	123,68	105,52	133,64	362,84	107,72	178,64	110,56	27,76	198,48	14,06	1,00	11,70	21,54	22,33	10,05	3,47	49,62	85	94	1	1
M2	Main type	First	MCSF	120,20	159,86	60,20	27,72	351,40	190,20	60,20	355,44	69,64	100,60	135,76	137,84	18	5	12	5	16	33	7	7	11	10	6	189,92	3,52	225,12	90,00	116,76	431,88	130,60	159,12	99,60	41,60	143,52	10,55	0,70	13,09	18,66	22,73	9,05	4,16	23,92	97	111	1	1
M3	Explorer	First	MCSF	128,79	170,07	29,36	17,16	135,00	44,52	29,36	150,92	37,96	84,72	241,32	243,32	29	12	15	6	20	41	8	7	17	15	7	183,16	7,72	137,04	85,60	128,76	351,40	175,68	109,08	123,00	31,04	207,20	6,32	0,64	8,57	21,96	15,58	7,24	2,07	29,60	136	136	3	2
M4	Main type	First	MCSF	131,85	178,29	42,96	10,84	42,96	125,96	165,92	56,48	156,52	181,08	244,76	248,48	14	3	11	5	15	31	7	8	12	10	5	204,36	11,52	126,28	82,20	193,04	401,52	99,76	167,24	101,72	59,16	154,76	14,60	3,84	12,95	14,25	20,91	8,48	5,92	30,95	90	59	0	0
M5	Main type	First	MCSF	131,28	179,63	37,40	204,76	37,40	354,00	221,76	43,12	256,28	236,92	300,20	302,68	21	7	14	5	14	33	7	7	10	10	6	234,68	4,20	189,08	94,12	123,80	407,00	116,72	136,08	54,36	48,84	190,12	11,18	0,60	12,33	16,67	19,44	5,44	4,88	31,69	101	88	0	0
M6	Shelter seeker	First	MCSF	124,97	175,60	49,88	1059,56	49,88	357,32	223,12	91,68	350,48	236,76	256,44	261,84	8	1	8	3	7	18	5	4	5	4	2	161,84	3,24	192,00	131,24	97,80	421,04	380,96	61,28	48,64	15,96	106,76	20,23	3,24	23,39	76,19	15,32	9,73	3,99	53,38	47	112	2	3
M7	Intermediate	First	MCSF	140,73	179,29	57,72	291,56	379,84	264,96	57,72	387,04	173,08	77,68	92,16	96,32	10	2	7	4	11	22	5	4	11	9	4	206,76	1,00	104,16	75,56	135,08	314,80	174,56	144,08	102,04	38,28	210,08	20,68	0,50	14,31	34,91	36,02	9,28	4,25	52,52	67	101	2	1
M8	Main type	First	MCSF	140,85	180,40	6,48	62,52	6,48	265,12	67,68	19,36	224,80	153,64	167,92	171,16	20	8	11	4	13	28	6	5	11	11	6	147,08	6,44	122,40	67,36	162,56	352,32	140,80	148,92	99,88	47,36	257,24	7,35	0,81	12,58	23,47	29,78	9,08	4,31	42,87	95	75	1	2
M9	Main type	First	MCSF	144,17	183,75	52,44	84,76	93,48	76,52	52,44	111,00	67,16	214,92	230,76	238,40	21	8	13	9	14	36	8	10	11	10	5	207,96	6,32	165,20	132,84	116,40	414,44	176,88	145,08	74,76	35,24	139,36	9,90	0,79	11,51	22,11	14,51	6,80	3,52	27,87	109	119	2	4
M10	Shelter seeker	First	MCSF	137,92	177,99	19,20	10,60	19,20	341,72	745,88	26,80	394,16	763,72	780,16	785,52	14	1	16	7	7	30	10	4	7	6	3	201,40	1,16	225,52	105,84	105,72	437,08	206,52	160,68	61,76	20,68	110,56	14,39	1,16	14,57	20,65	40,17	8,82	3,45	36,85	75	91	0	2
M11	Main type	First	MCSF	138,61	180,98	45,80	176,80	45,80	426,00	185,84	53,44	343,84	209,32	214,00	252,44	13	2	12	5	13	30	7	8	11	11	5	213,68	2,96	158,04	141,52	142,16	441,72	110,72	127,16	90,04	52,36	161,32	16,44	1,48	14,72	15,82	15,90	8,19	4,76	32,26	87	94	0	7
M12	Main type	First	MCSF	149,80	191,96	14,64	1060,08	876,68	740,88	14,64	883,32	52,92	31,20	145,32	148,32	8	1	5	3	19	27	4	7	16	11	5	113,56	2,60	74,28	76,56	279,64	430,48	87,40	218,40	138,16	72,40	137,04	14,20	2,60	15,94	21,85	31,20	8,64	6,58	27,41	79	78	1	2
O1	Shelter seeker	Second	OF	124,62	178,37	26,88	104,32	139,88	26,88	99,16	147,96	80,44	458,72	470,36	477,56	10	3	9	4	12	25	7	6	10	8	4	163,16	8,56	140,12	127,20	123,96	391,28	324,88	109,44	69,20	26,24	106,24	16,32	2,85	15,65	46,41	18,24	6,92	3,28	26,56	73	86	1	2
O2	Main type	Second	OF	127,77	170,11	26,64	677,44	644,28	352,80	26,64	759,76	149,88	33,48	41,76	44,88	14	4	8	3	16	27	5	6	14	14	7	182,48	2,20	228,52	68,28	175,96	472,76	106,92	137,40	90,80	53,36	152,64	13,03	0,55	17,51	21,38	22,90	6,49	3,81	21,81	91	103	2	4
O3	Intermediate	Second	OF	127,89	176,65	22,64		195,16	22,64	84,00	199,16	75,08	91,76	135,64	137,44	7	0	12	3	13	28	9	5	13	10	5	71,60	0,00	150,36	131,04	126,20	407,60	196,40	47,32	149,08	44,60	281,96	10,23		14,56	21,82	9,46	11,47	4,46	56,39	77	72	0	3
O4	Main type	Second	OF	128,53	174,06	26,24	15,24	26,24	262,60	155,92	31,96	164,04	189,80	201,72	205,88	26	11	17	5	17	39	10	7	12	8	4	176,76	5,72	214,40	91,68	123,76	429,84	213,40	137,28	89,32	30,16	116,32	6,80	0,52	11,02	21,34	19,61	7,44	3,77	29,08	117	109	1	0
O5	Main type	Second	OF	127,07	177,18	30,40		272,80	30,40	48,92	286,60	42,36	56,04	112,56	114,96	11	0	9	6	22	37	5	8	18	9	4	115,24	0,00	119,60	69,04	240,48	429,12	57,24	140,28	294,76	36,12	126,04	10,48		11,60	11,45	17,54	16,38	4,01	31,51	92	65	2	3
O6	Explorer	Second	OF	132,34	177,41	27,36	6,92	235,60	101,28	27,36	243,36	88,24	36,96	51,08	52,12	26	8	17	12	21	50	9	16	15	14	7	165,36	3,96	203,64	123,64	182,72	510,00	105,60	159,28	67,40	43,44	143,60	6,36	0,50	10,20	11,73	9,96	4,49	3,10	20,51	145	121	6	4
O7	Main type	Second	OF	121,75	163,27	10,08	173,28	142,64	69,00	10,08	145,96	55,44	21,48	91,72	92,68	13	1	14	6	16	36	9	6	15	11	6	177,80	0,52	164,68	95,68	106,48	366,84	220,68	148,76	80,44	40,24	163,44	13,68	0,52	10,19	24,52	24,79	5,36	3,66	27,24	97	113	2	1
O8	Explorer	Second	OF	128,95	177,16	18,84	113,56	91,68	123,56	18,84	100,96	126,84	37,64	41,60	42,48	24	10	11	9	20	40	6	12	15	13	7	161,52	6,20	166,08	122,20	169,92	458,20	75,88	209,64	99,64	42,44	145,12	6,73	0,62	11,46	12,65	17,47	6,64	3,26	20,73	127	125	3	3
O9	Intermediate	Second	OF	130,24	175,40	20,56	193,32	203,52	83,04	20,56	217,52	90,72	33,40	48,56	131,32	23	10	10	7	15	32	4	8	13	11	5	182,88	8,32	194,12	79,16	173,88	447,16	87,28	162,28	97,20	51,60	162,16	7,95	0,83	13,97	21,82	20,29	7,48	4,69	32,43	106	103	3	3
O10	Intermediate	Second	OF	131,12	182,86	16,36		16,36	448,00	339,92	24,12	348,04	385,60	490,72	496,92	7	0	6	5	15	26	3	9	12	8	3	61,80	0,00	65,12	90,92	212,72	368,76	271,76	117,48	142,52	91,80	144,64	8,83		14,18	90,59	13,05	11,88	11,48	48,21	68	80	2	0
O11	Explorer	Second	OF	129,24	168,67	23,36	217,24	23,36	59,24	117,24	32,16	70,80	127,92	132,96	138,32	24	6	13	12	17	42	5	10	16	17	9	200,32	3,88	168,92	191,16	140,48	500,56	65,96	149,48	77,60	47,56	153,64	8,35	0,65	11,92	13,19	14,95	4,85	2,80	17,07	129	122	1	10
O12	Main type	Second	OF	139,47	193,53	37,52	755,64	198,96	164,68	37,52	212,80	76,04	48,64	126,72	134,72	23	4	18	7	22	47	10	9	14	8	4	140,00	1,40	131,96	103,32	217,24	452,52	143,36	161,72	124,04	28,16	147,52	6,09	0,35	9,63	14,34	17,97	8,86	3,52	36,88	119	108	0	2
B1	Explorer	Second	OF-SB	138,48	179,97	37,92	0,96	334,80	113,08	37,92	339,40	103,64	62,60	65,48	67,84	24	8	12	6	21	39	6	8	17	12	5	159,68	6,08	135,72	116,20	142,40	394,32	114,12	189,96	99,16	79,12	156,12	6,65	0,76	10,11	19,02	23,75	5,83	6,59	31,22	119	138	0	2
B2	Shelter seeker	Second	OF-SB	150,53	194,65	34,20	299,04	34,20	115,96	304,96	50,72	310,96	351,44	356,28	357,16	8	1	10	3	9	22	6	5	8	8	4	144,68	0,56	175,32	71,80	74,08	321,20	453,04	111,28	42,84	27,64	97,88	18,09	0,56	14,60	75,51	22,26	5,36	3,46	24,47	62	78	2	2
B3	Explorer	Second	OF-SB	145,01	189,67	15,20	324,68	15,20	40,96	71,64	165,48	229,20	85,04	115,28	119,28	23	6	15	7	17	39	7	8	14	13	7	230,12	6,16	142,72	94,04	138,68	375,44	123,84	159,72	97,52	49,36	156,40	10,01	1,03	9,63	17,69	19,97	6,97	3,80	22,34	117	120	3	2
B4	Main type	Second	OF-SB	150,42	196,07	27,68	290,32	27,68	111,88	130,16	53,32	122,00	173,28	177,96	185,40	13	2	10	8	12	30	6	8	10	11	7	186,84	1,68	149,96	94,36	142,68	387,00	125,44	239,20	60,84	75,64	122,16	14,37	0,84	12,90	20,91	29,90	6,08	6,88	17,45	87	146	1	3
B5	Shelter seeker	Second	OF-SB	149,41	201,62	9,52		9,52	160,20	231,76	29,20	178,48	241,00	280,88	284,48	11	0	12	7	11	30	7	6	10	7	3	128,68	0,00	182,08	92,04	142,36	416,48	328,48	136,08	78,08	35,64	74,92	11,70		13,88	46,93	22,68	7,81	5,09	24,97	74	100	1	0
B6	Main type	Second	OF-SB	149,42	128,96	14,92	2,88	14,92	70,84	225,56	22,76	81,68	237,44	241,64	242,64	16	3	13	6	14	33	7	7	12	9	4	132,56	1,84	156,36	69,04	146,12	371,52	151,16	196,36	156,28	49,88	129,04	8,29	0,61	11,26	21,59	28,05	13,02	5,54	32,26	91	88	1	1
B7	Main type	Second	OF-SB	140,73	194,76	6,24	31,32	37,88	16,32	6,24	46,08	9,44	101,00	106,56	107,40	14	2	10	8	15	33	6	10	13	11	5	110,68	1,88	148,76	127,36	175,32	451,44	237,36	156,92	91,60	35,32	111,56	7,91	0,94	13,68	39,56	15,69	7,05	3,21	22,31	94	86	1	5
B8	Shelter seeker	Second	OF-SB	110,33	196,62	64,72	53,00	93,84	155,96	64,72	111,48	227,00	250,84	257,92	268,28	14	5	9	5	9	23	6	5	6	5	3	251,24	3,72	153,12	80,20	232,00	465,32	219,92	100,24	41,44	27,28	89,72	17,95	0,74	20,23	36,65	20,05	6,91	5,46	29,91	67	101	2	1
B9	Shelter seeker	Second	OF-SB	146,74	186,44	21,20	844,80	21,20	168,80	258,00	28,12	183,52	267,96	272,72	276,72	13	1	18	5	12	35	12	7	9	7	3	118,28	1,16	284,04	91,84	135,16	511,04	250,60	139,40	63,76	36,16	78,44	9,10	1,16	14,60	20,88	19,91	7,08	5,17	26,15	87	105	1	1
B10	Shelter seeker	Second	OF-SB	143,51	181,20	22,60		22,60	158,20	143,64	67,36	150,84	228,60	240,64	241,72	6	0	8	2	6	16	5	3	6	6	3	145,64	0,00	100,68	29,68	51,12	181,48	585,92	146,16	64,92	16,80	58,04	24,27		11,34	117,18	48,72	10,82	2,80	19,35	45	59	0	0
B11	Intermediate	Second	OF-SB	148,30	199,26	3,60	238,84	71,84	108,00	3,60	78,00	118,28	16,08	21,20	22,04	21	6	16	6	19	41	10	10	14	13	6	145,76	4,84	198,00	71,68	124,28	393,96	286,88	143,92	58,16	58,96	106,48	6,94	0,81	9,61	28,69	14,39	4,15	4,54	17,75	121	118	0	2
B12	Explorer	Second	OF-SB	145,00	187,84	20,48	196,28	199,92	20,48	61,28	204,64	44,60	70,36	73,72	75,80	20	6	12	7	15	34	6	7	13	12	6	186,84	5,56	133,36	148,16	110,76	392,28	93,76	219,96	65,08	66,00	160,12	9,34	0,93	11,54	15,63	31,42	5,01	5,50	26,69	104	135	3	4
E1	Main type	Second	EPM	136,73	188,47	20,36	255,28	428,60	218,56	20,36	432,52	58,36	34,32	40,96	154,56	18	7	10	5	16	31	6	9	12	11	5	198,44	9,88	150,08	74,20	104,08	328,36	139,00	149,28	104,20	65,96	204,92	11,02	1,41	10,59	23,17	16,59	8,68	6,00	40,98	99	131	1	0
E2	Main type	Second	EPM	125,43	181,32	35,16	360,16	143,88	515,28	35,16	148,60	42,20	123,84	458,20	459,08	22	6	21	2	18	41	13	5	10	7	4	199,60	2,60	151,68	40,88	188,80	381,36	313,80	81,80	80,96	24,04	115,88	9,07	0,43	9,30	24,14	16,36	8,10	3,43	28,97	108	86	0	0
E3	Shelter seeker	Second	EPM	132,21	177,61	70,72	299,80	70,72	381,56	307,24	76,04	366,00	520,40	525,60	532,92	9	1	9	3	9	21	5	5	5	4	2	179,88	0,56	117,32	51,28	213,08	381,68	275,64	149,68	58,40	36,60	117,60	19,99	0,56	18,18	55,13	29,94	11,68	9,15	58,80	52	84	3	1
E4	Intermediate	Second	EPM	148,01	189,06	40,16	108,04	114,24	173,96	40,16	123,48	191,40	58,44	218,56	359,88	17	6	11	5	13	29	6	5	11	7	3	173,16	6,76	140,44	134,36	178,96	453,76	202,08	93,00	107,00	55,24	100,60	10,19	1,13	15,65	33,68	18,60	9,73	7,89	33,53	84	91	1	0
E5	Shelter seeker	Second	EPM	142,54	185,42	76,00	15,12		183,20	76,00		127,00	105,48			5	2	0	1	7	8	0	2	3	0	0	139,92	4,20	0,00	7,72	939,00	946,72	0,00	28,32	80,88	0,00	0,00	27,98	2,10	118,34		14,16	26,96			20	27	0	1
E6	Main type	Second	EPM	146,70	193,76	34,08	23,32	34,08	325,40	110,84	46,20	135,12	253,08	258,68	265,00	23	9	15	3	14	32	9	6	9	10	5	252,08	8,12	165,28	54,64	162,72	382,64	133,32	128,64	65,40	48,64	173,12	10,96	0,90	11,96	14,81	21,44	7,27	4,86	34,62	103	118	0	2
E7	Main type	Second	EPM	158,84	197,45	15,92	213,36	375,08	557,52	15,92	385,08	184,04	57,32	133,52	136,64	14	5	7	3	16	26	4	6	13	11	5	194,48	7,84	127,16	48,56	196,04	371,76	87,20	123,76	110,76	68,84	230,24	13,89	1,57	14,30	21,80	20,63	8,52	6,26	46,05	84	96	1	2
E8	Main type	Second	EPM	139,40	178,18	37,40	30,52	198,72	276,96	37,40	205,76	48,52	111,32	121,48	123,52	14	3	8	5	14	27	5	6	12	13	7	180,80	2,88	124,96	84,72	130,40	340,08	132,60	158,88	97,76	58,80	226,08	12,91	0,96	12,60	26,52	26,48	8,15	4,52	32,30	87	121	0	1
E9	Main type	Second	EPM	138,88	190,98	25,92	186,36	203,80	266,12	25,92	217,96	31,96	75,60	136,76	143,44	20	9	10	3	15	28	6	6	10	8	4	140,76	9,64	102,16	51,28	117,40	270,84	232,00	238,44	88,84	40,00	179,52	7,04	1,07	9,67	38,67	39,74	8,88	5,00	44,88	91	94	0	1
E10	Main type	Second	EPM	157,57	202,11	8,68	778,16	346,88	418,76	8,68	361,32	14,48	117,68	128,88	130,32	14	4	12	4	10	26	7	6	9	11	6	168,68	5,56	199,96	59,80	152,64	412,40	105,16	128,48	80,12	45,48	252,40	12,05	1,39	15,86	15,02	21,41	8,90	4,13	42,07	83	122	4	2
E11	Shelter seeker	Second	EPM	135,16	180,00	14,96	283,68	14,96	499,20	464,92	22,08	490,08	953,32	964,28	970,12	10	4	14	1	3	18	10	2	3	5	3	68,44	6,52	256,40	14,16	88,76	359,32	493,32	25,72	73,52	28,44	144,76	6,84	1,63	19,96	49,33	12,86	24,51	5,69	48,25	55	48	0	0
E12	Main type	Second	EPM	149,13	195,68	13,08	224,36	230,36	13,08	34,12	246,96	23,00	54,16	66,04	69,08	19	7	10	7	13	30	6	8	10	10	5	147,20	8,00	115,32	110,64	176,52	402,48	74,68	139,80	122,36	50,20	253,92	7,75	1,14	13,42	12,45	17,48	12,24	5,02	50,78	95	97	4	1
[truncated: 224 more columns]
